# Supplementary material for: Effects of Vitrectomy and Lensectomy on Older Rhesus Macaques: Oxygen Distribution, Antioxidant Status, and Aqueous Humor Dynamics
Source: PubMed Central journal article supplement — Invest Ophthalmol Vis Sci. 2017 Aug;58(10):4003–14. doi: 10.1167/iovs.17-21890 (PMC5555251; doi:10.1167/iovs.17-21890), 2017-08
Supplement: iovs-58-09-40_s01.pdf [file iovs-58-09-40_s01.pdf]

Supplementary Table S1. Primer design for *Macaca mulatta* tissues.

| gene name | primer sequence                | product size | species               |
|-----------|--------------------------------|--------------|-----------------------|
| Fn1       | F: 5' CTCTCCCCACCGTCTCAAC 3'   | 130bp        | <b>Macaca mulatta</b> |
|           | R: 5' ATCATTTGCTGAGCCTGCCT 3'  |              |                       |
| NF-kB     | F: 5' CCCTCTGTGTGTTTGCACATC 3' | 108bp        | <b>Macaca mulatta</b> |
|           | R: 5' GTCTCCTGCGCACTTTCTCT 3'  |              |                       |
| GAPDH     | F: 5' TGATTCTCCCATGGCGATT 3'   | 92bp         | <b>Macaca mulatta</b> |
|           | R: 5' ACTCCTGCGAGATGGTGATG 3'  |              |                       |

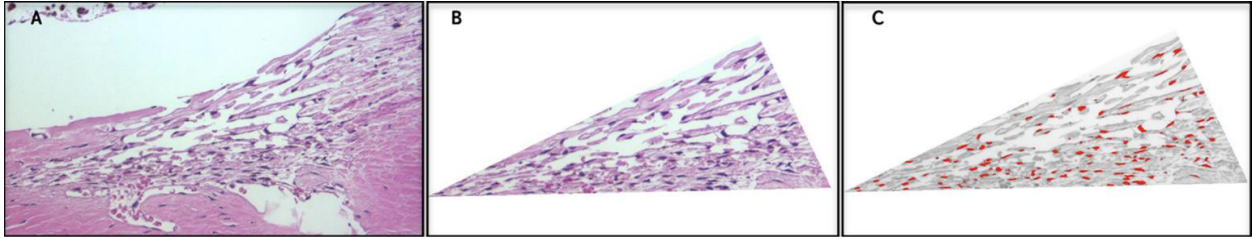

Supplementary Figure S1

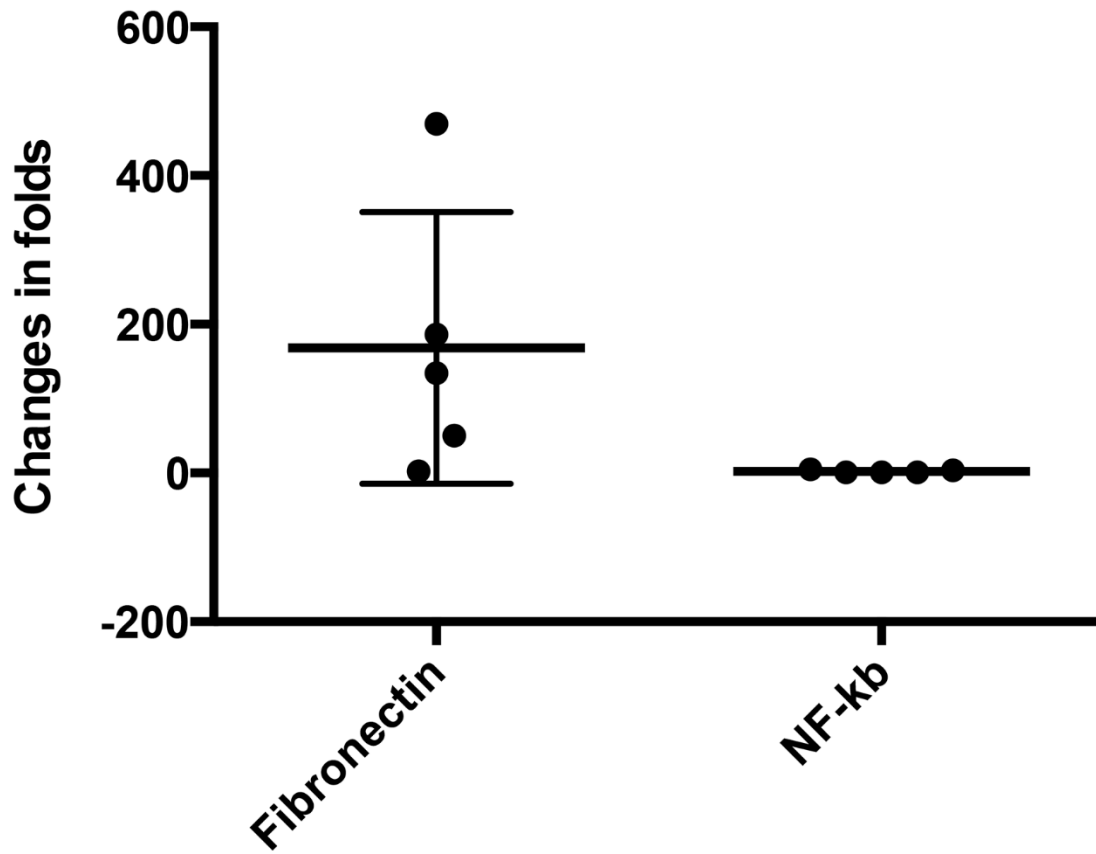

|                 | <b>Fibronectin</b> | <b>NF-kb</b> |
|-----------------|--------------------|--------------|
| <b>Control</b>  | 1.0                | 1.0          |
| <b>Surgical</b> | 168.4 ± 163.5      | 2.4 ± 1.8    |
| <b>p-value</b>  | 0.192              | 0.408        |

Supplementary Figure S2
